# Supplementary material for: Aquatic Ecosystem Response to Timber Harvesting for the Purpose of Restoring Aspen
Source: PLOS journal article supplement (doi:10.1371/journal.pone.0084561), 2013-12-20

**Figure S3. Mean and standard error of turbidity levels for Bailey Creek sample stations (2003-2004, 2006-2010).** Q = mean annual discharge ( $\text{m}^3 \text{min}^{-1}$ ) measured from June 15 through August 31. P = percent of mean annual precipitation.

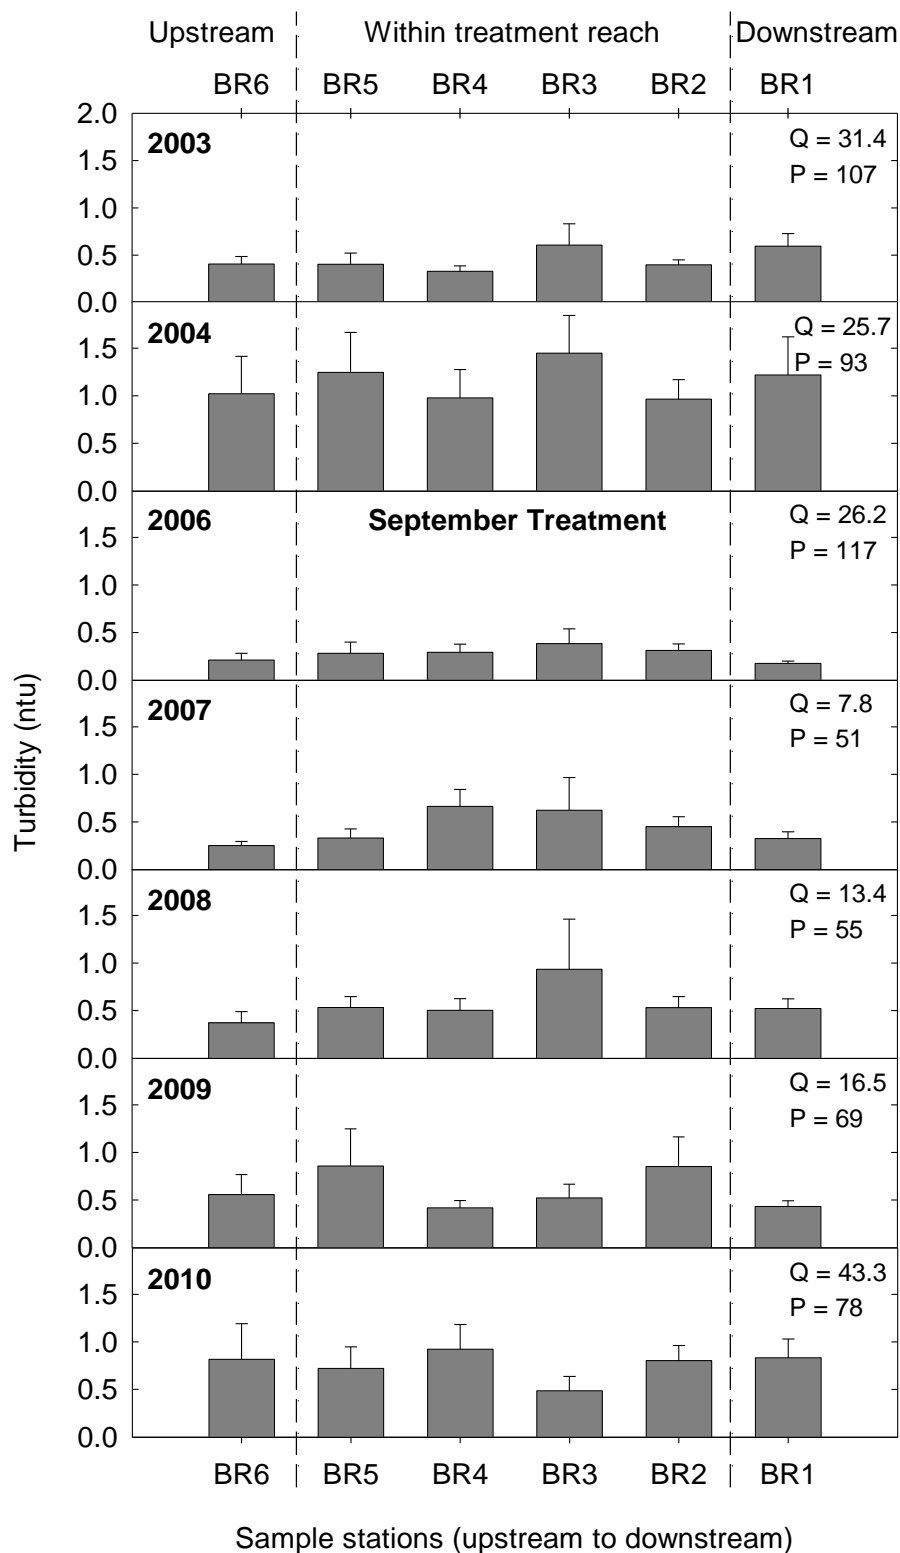

Supplement: S3 (10.1371/journal.pone.0084561.s003) [file journal.pone.0084561.s003]
