# Supplementary material for: Aquatic Ecosystem Response to Timber Harvesting for the Purpose of Restoring Aspen
Source: PLOS journal article supplement (doi:10.1371/journal.pone.0084561), 2013-12-20

**Photo S4. Pine-Bogard Project Phase 2 treatment area.** Right side of photo illustrates untreated conifer density, and left side of photo illustrates post-treatment conditions. Photo taken September 2005, immediately following treatment implementation.

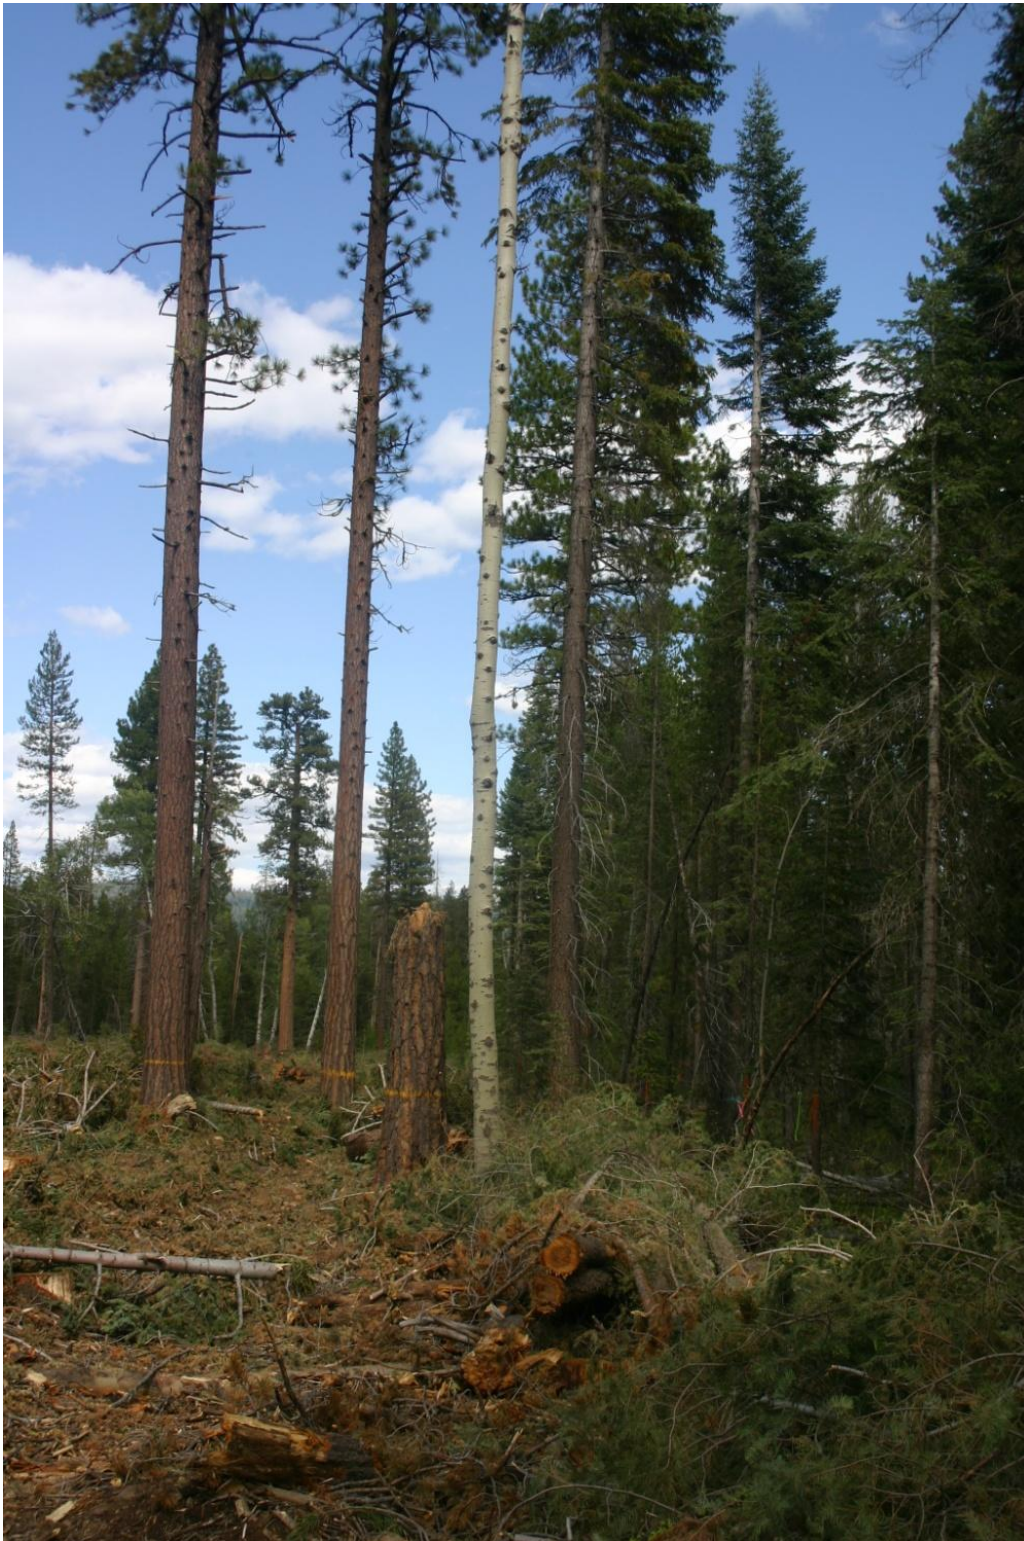

Supplement: S19 (10.1371/journal.pone.0084561.s019) [file journal.pone.0084561.s019]
